# Supplementary material
Source: MDPI journal article supplement (https://www.mdpi.com/2076-3417/13/7/4318)
Supplement: s1 [file s1]

Supplementary

# Strategic Development of Dielectric Strength Prediction Protocol for Perfluorocarbon and Nonperfluorocarbon Compounds

Min Kyu Choi <sup>1</sup> and Ki Chul Kim <sup>1,2\*</sup>

<sup>1</sup> Computational Materials Design Laboratory, Department of Chemical Engineering, Konkuk University, Seoul 05029, Republic of Korea

<sup>2</sup> Division of Chemical Engineering, Konkuk University, Seoul 05029, Republic of Korea

\* Correspondence: kich2018@konkuk.ac.kr

**Abstract:** Predicting the dielectric strengths of organic compounds is critical for identifying potential insulating gases. However, experimental evaluation techniques are time-consuming, and current computational protocols are limited in scope. In this study, to develop a reliable prediction protocol for the dielectric strengths of a broad array of perfluorocarbon (PFC) and non-PFC compounds, systematic linear regression is combined with computational calculations of relevant core factors. The designed equation-based protocol is demonstrated to have four core factors, including two high-correlation factors (polarizability and molecular weight) and two critical factors (ionization energy and highest occupied molecular orbital (HOMO)–lowest unoccupied molecular orbital (LUMO) gap). The two critical factors are crucial for determining a suitable protocol, as reliable predictions of dielectric strength are only possible if the ionization energy and HOMO–LUMO gap are maintained within specified ranges for all the compounds. These findings can act as design guidelines for future computational protocols to predict the insulating properties of PFC and non-PFC compounds.

**Citation:** Choi, M.K.; Kim, K.C. Strategic Development of Dielectric Strength Prediction Protocol for Perfluorocarbon and Nonperfluorocarbon Compounds. *Appl. Sci.* **2023**, *13*, 4318. <https://doi.org/10.3390/app13074318>

Academic Editor: Marta Erminia Alberti

Received: 6 January 2023

Revised: 23 March 2023

Accepted: 28 March 2023

Published: 29 March 2023

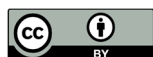

**Copyright:** © 2023 by the authors. Submitted for possible open access publication under the terms and conditions of the Creative Commons Attribution (CC BY) license (<https://creativecommons.org/licenses/by/4.0/>).

**Keywords:** dielectric strength; insulating gas; computational protocol; organic compound; regression; density functional theory

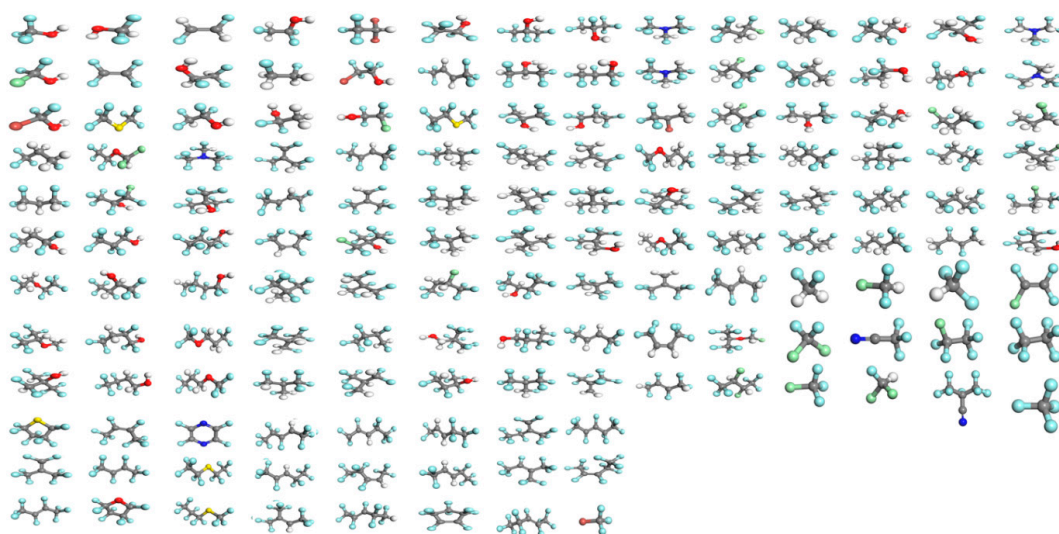

**Figure S1.** A total of 150 PFC compounds introduced in this study. Atoms with gray, white, red, blue, cyan, light green, and yellow in color depict carbon, hydrogen, oxygen, nitrogen, fluorine, chlorine, and sulfur, respectively.

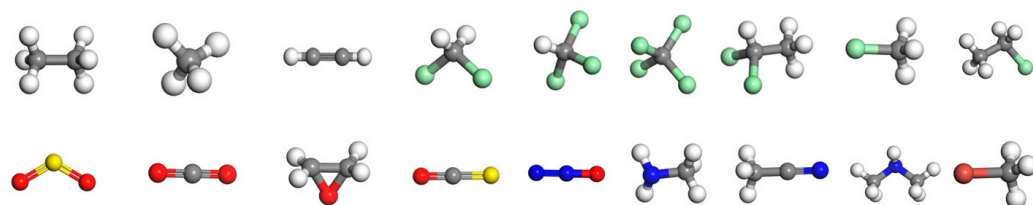

**Figure S2.** A total of 18 non-PFC compounds introduced in this study. Atoms with gray, white, red, blue, brown, light green, and yellow in color depict carbon, hydrogen, oxygen, nitrogen, bromine, chlorine, and sulfur, respectively.

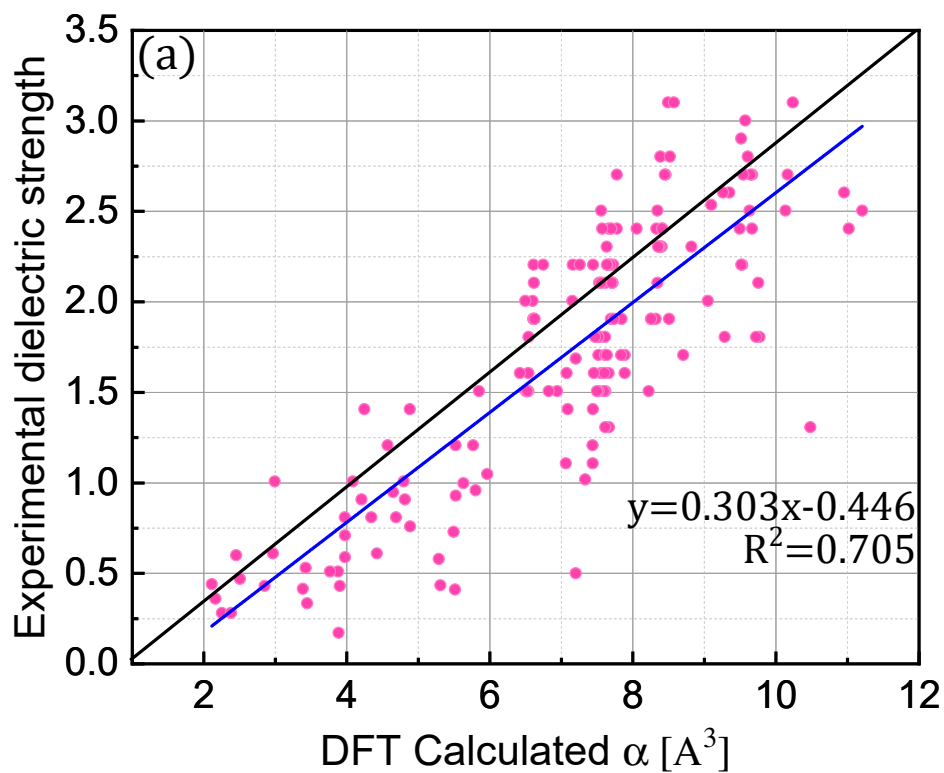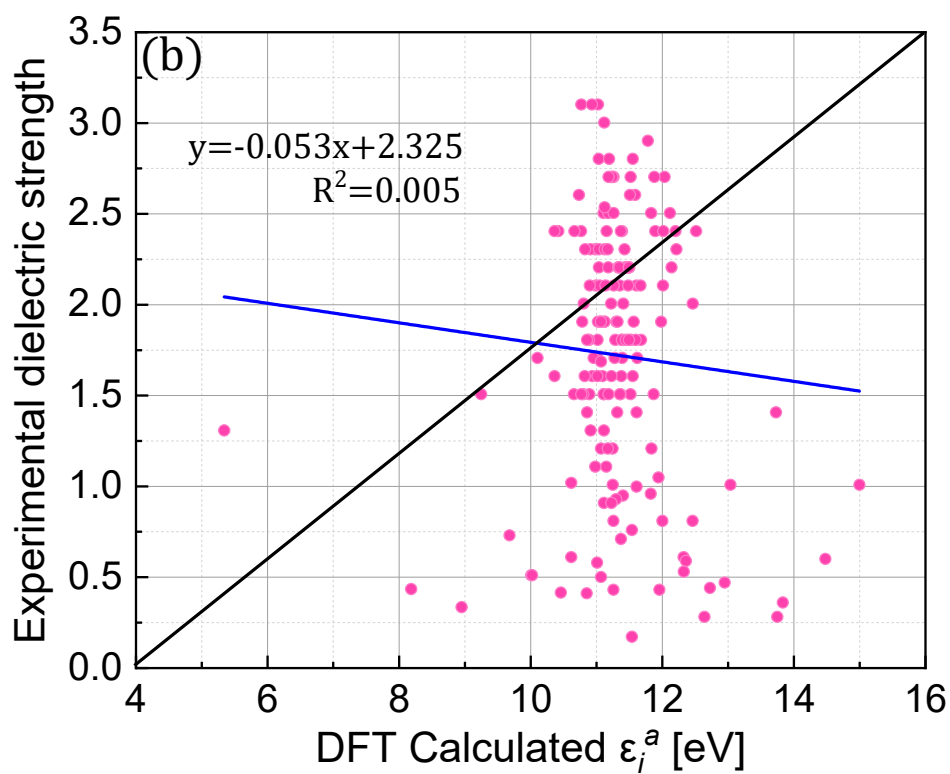

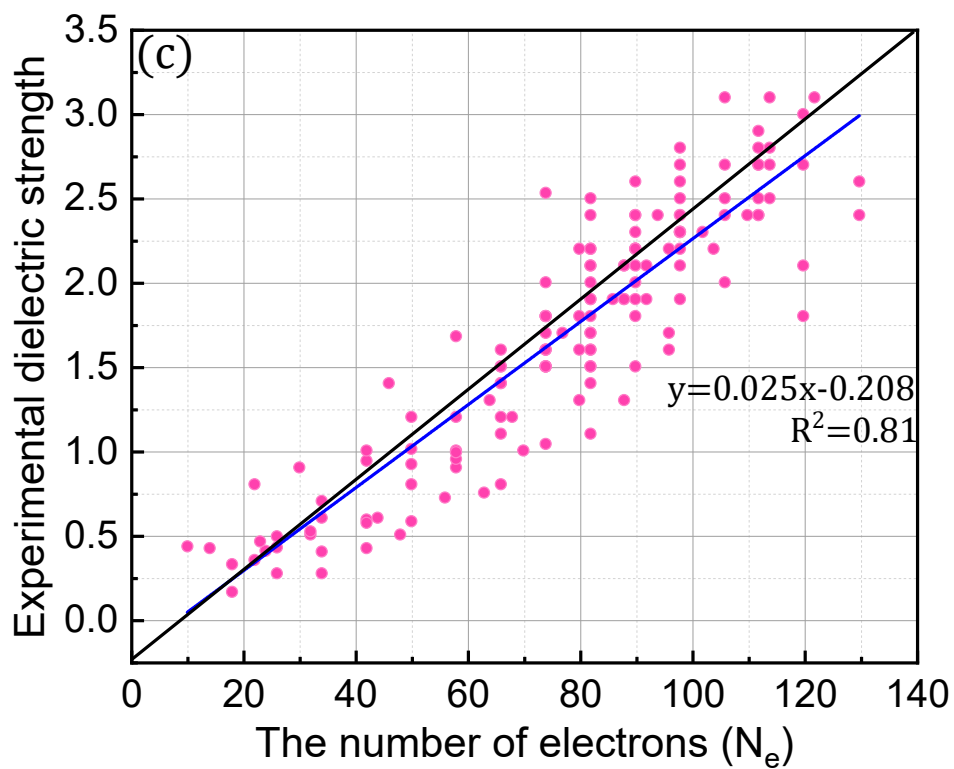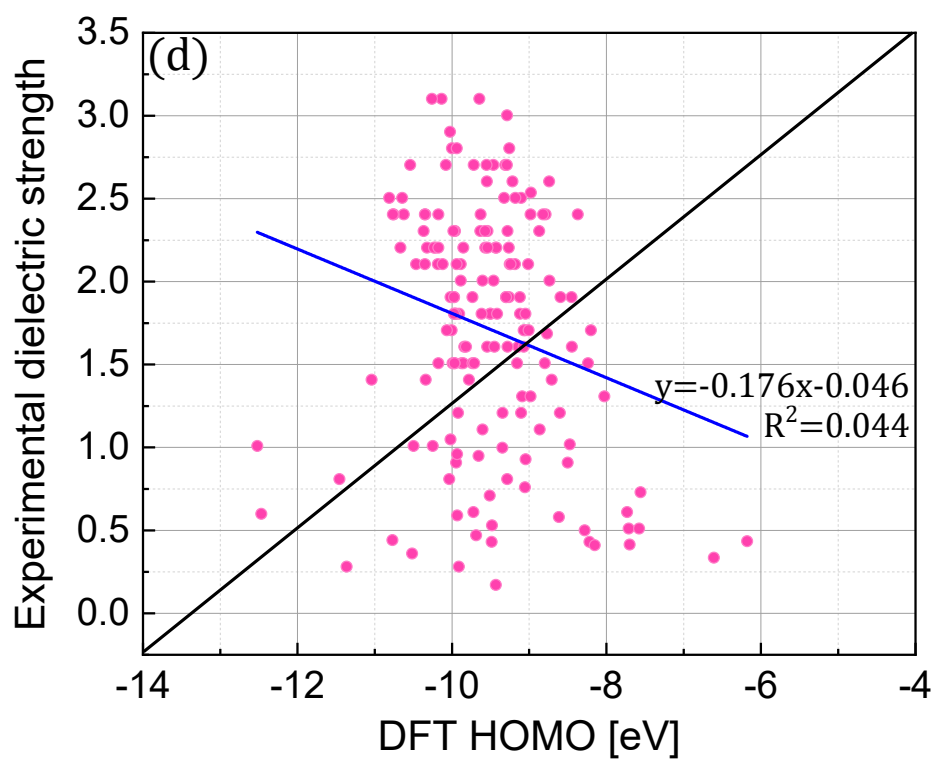

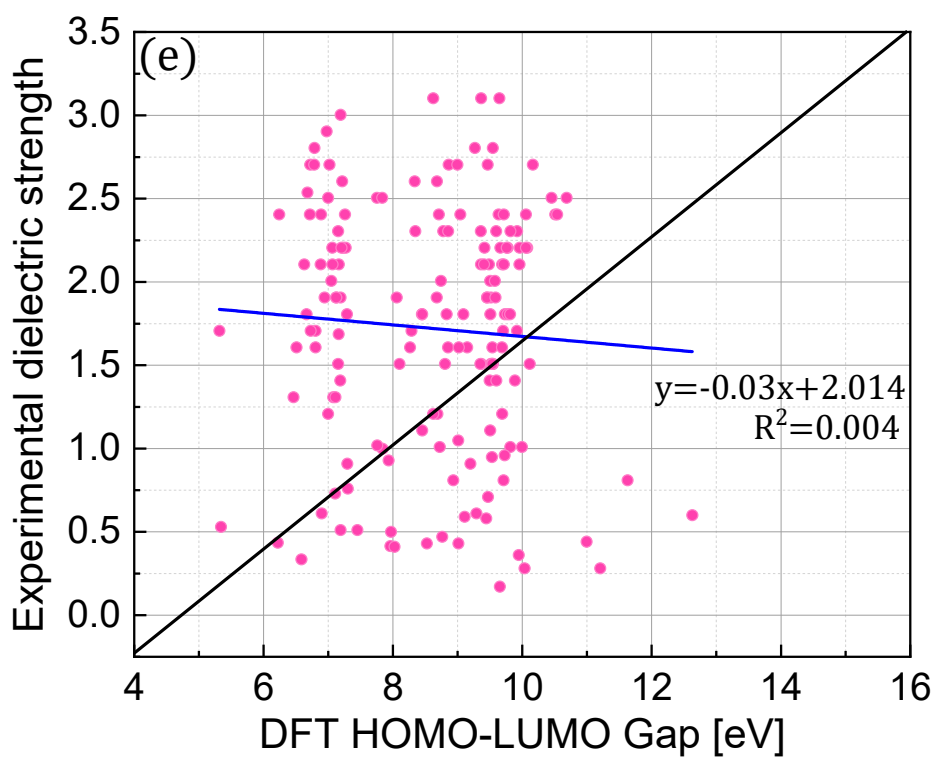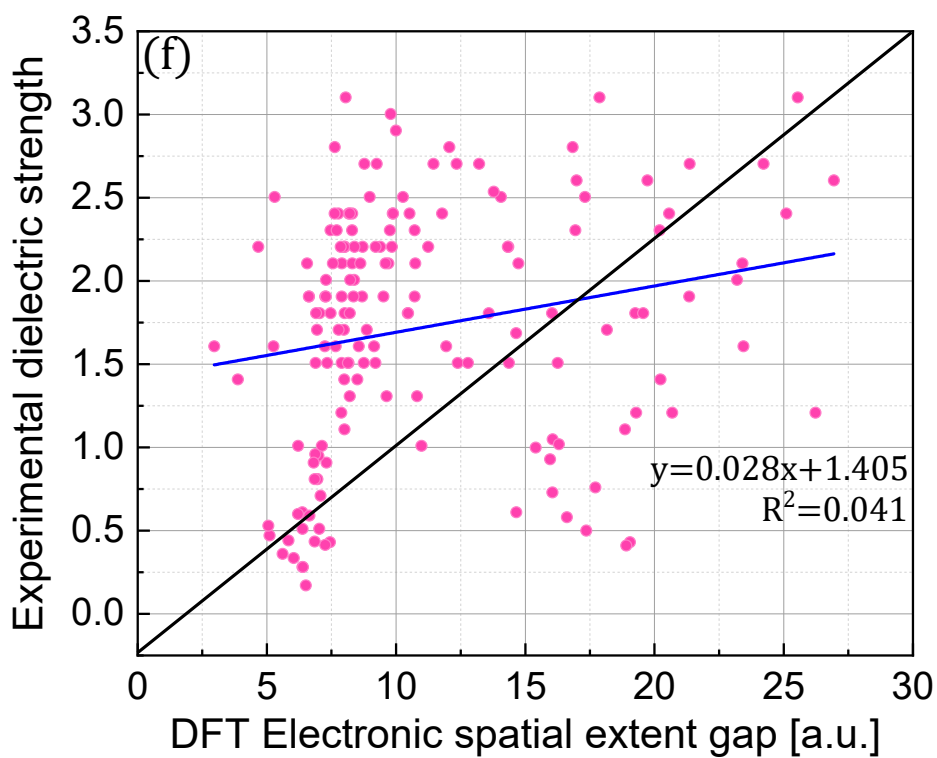

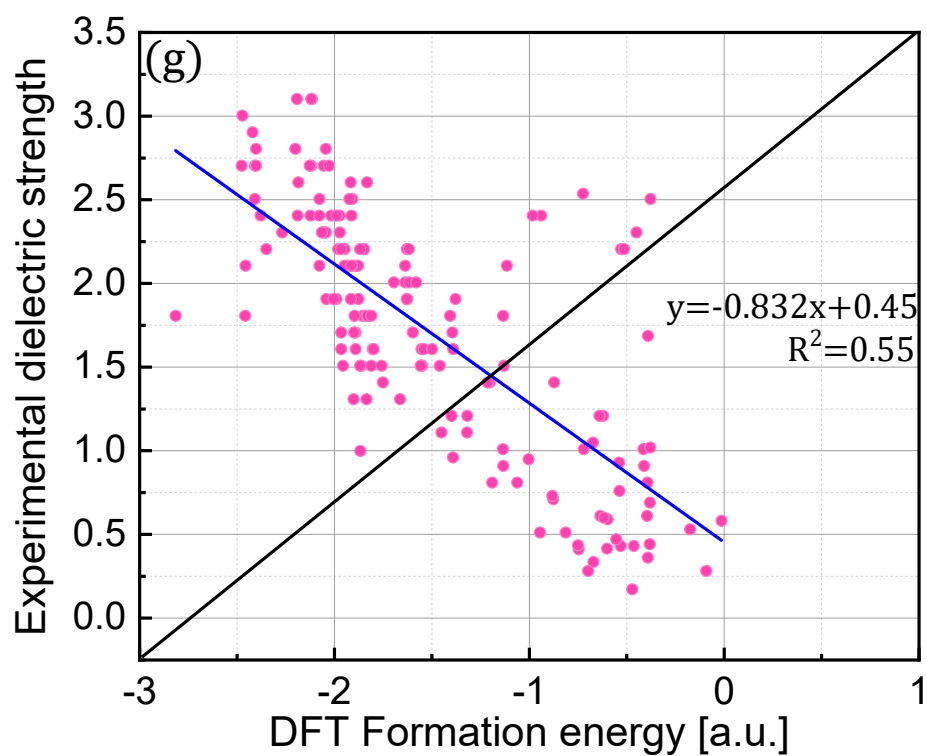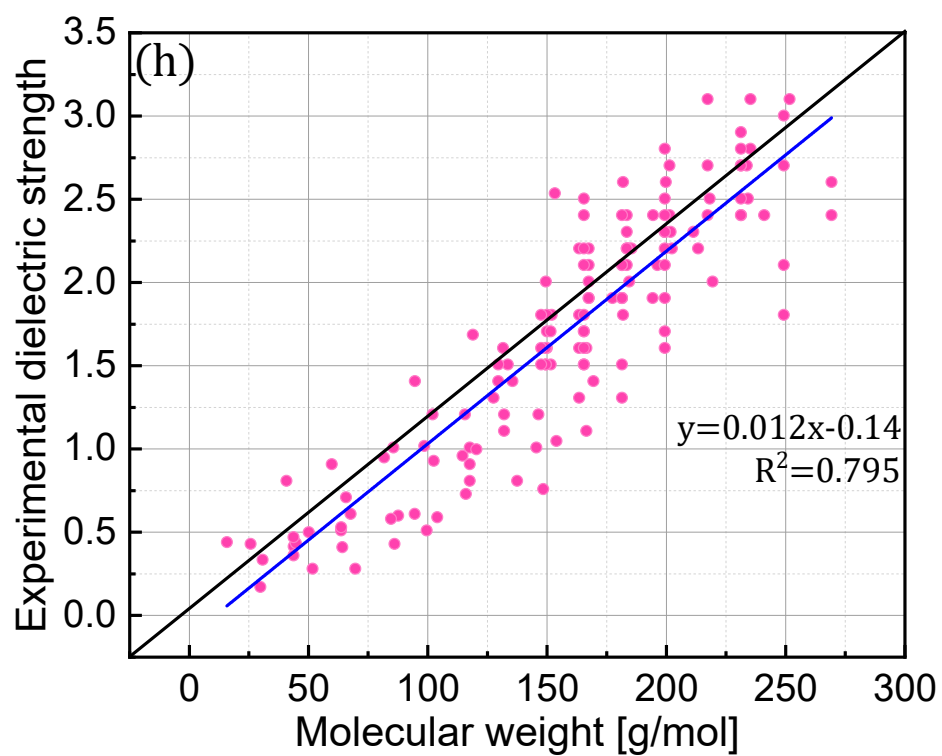

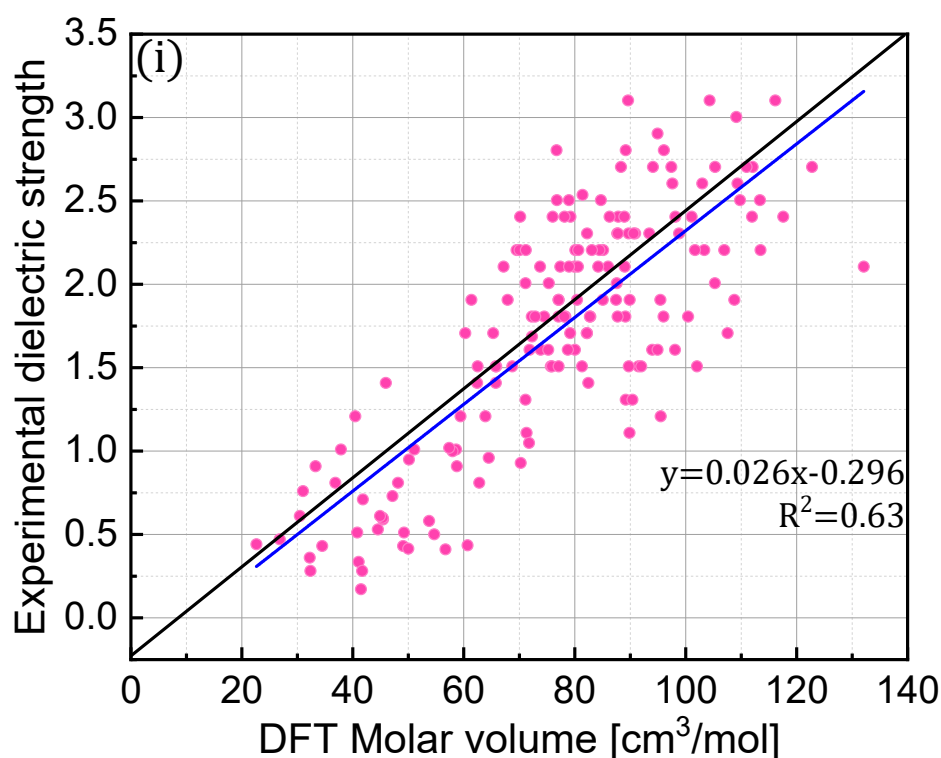

**Figure S3.** Correlations of experimental dielectric strength with (a) DFT-computed polarizability, (b) DFT-computed ionization energy, (c) the number of electrons, (d) DFT-computed HOMO, (e) DFT-computed HOMO-LUMO gap, (f) DFT-computed electronic spatial extent gap, (g) DFT-computed formation energy, (h) molecular weight, and (i) DFT-computed molar volume.

**Table S1.** Chemical formula and IUPAC name for each of 150 PFC compounds drawn in Figure S1.

| No. | Formula  | IUPAC name                                   |
|-----|----------|----------------------------------------------|
| 1   | C2F4     | Tetrafluoroethylene                          |
| 2   | C2F6S    | Bis(trifluoromethyl) sulfide                 |
| 3   | C2H2F2   | 1,2-Difluoroethene                           |
| 4   | C2H2F4O  | 1,2,2,2-Tetrafluoroethanol                   |
| 5   | C2H2F4O  | Tetrafluoroethanol                           |
| 6   | C2H3F3O  | 1,1,2-Trifluoroethanol                       |
| 7   | C2H4F2   | 1,2-Difluoroethane                           |
| 8   | C2H4F2O  | 1,1-difluoroethanol                          |
| 9   | C2HBr2F3 | 2,2-dibromo-1,1,1-trifluoroethane            |
| 10  | C2HBrF4O | 2-Bromo-1,1,2,2-tetrafluoroethanol           |
| 11  | C2HClF4O | 2-Chloro-1,1,2,2-tetrafluoroethanol          |
| 12  | C2HF5O   | 1,1,2,2,2-Pentafluoroethanol                 |
| 13  | C2HF5S   | 1,1,2,2,2-Pentafluoroethanethiol             |
| 14  | C3F8S    | (Trifluoromethyl)-(pentafluoroethyl) sulfide |
| 15  | C3H2F6O  | (2S)-1,1,1,2,3,3-Hexafluoropropan-2-ol       |
| 16  | C3H2F6O  | 1,1,1,3,3,3-Hexafluoro-2-propanol            |

|    |           |                                                                   |
|----|-----------|-------------------------------------------------------------------|
| 17 | C3H2F6O   | (2R)-1,1,1,2,3,3-Hexafluoropropan-2-ol                            |
| 18 | C3H2F6O   | 1,1,1,2,3,3-Hexafluoro-2-propanol                                 |
| 19 | C3H2F6O   | Hexafluoro-1-Propanol                                             |
| 20 | C3H2F6O   | 1,1,2,3,3,3-Hexafluoropropan-1-ol                                 |
| 21 | C3H2F7N   | 1,1,1-Trifluoro-N-(fluoromethyl)-N-(trifluoromethyl)methanamine   |
| 22 | C3H2F7N   | Bis(difluoromethyl)(trifluoromethyl)amine                         |
| 23 | C3H3BrF4  | 2-Bromo-1,1,1,3-tetrafluoropropane                                |
| 24 | C3H3ClF4  | 3-Chloro-1,1,1,3-tetrafluoropropane                               |
| 25 | C3H3ClF4  | 2-Chloro-1,1,1,3-tetrafluoropropane                               |
| 26 | C3H3ClF4  | 2-chloro-1,1,3,3-tetrafluoropropane                               |
| 27 | C3H3F5    | (2R)-1,1,1,2,3-Pentafluoropropane                                 |
| 28 | C3H3F5    | 1,1,1,2,3-Pentafluoropropane                                      |
| 29 | C3H3F5O   | 1,1,1,3,3-Pentafluoropropan-2-ol                                  |
| 30 | C3H3F5O   | 2,2,3,3,3-Pentafluoro-1-propanol                                  |
| 31 | C3H3F5O   | 1,2,3,3,3-Pentafluoropropan-1-ol                                  |
| 32 | C3H3F5O   | 3-Pentafluoropropanol                                             |
| 33 | C3H3F5O   | Pentafluoro isopropanol                                           |
| 34 | C3H3F5O   | 1,1-Difluoro-2-(trifluoromethoxy)ethane                           |
| 35 | C3H3F6N   | N-(Difluoromethyl)-1,1,1-trifluoro-N-(fluoromethyl)methanamine    |
| 36 | C3H3F6N   | N,N-bis(difluoromethyl)-1,1-difluoromethanamine                   |
| 37 | C3H4ClF3  | 1-chloro-1,1,3-trifluoropropane                                   |
| 38 | C3H4ClF3  | 1-chloro-1,3,3-trifluoropropane                                   |
| 39 | C3H4F4    | 1,1,1,3-tetrafluoropropane                                        |
| 40 | C3H4F4    | 1,1,3,3-tetrafluoropropane                                        |
| 41 | C3H4F4O   | 1,1,3,3-Tetrafluoropropan-1-ol                                    |
| 42 | C3HCl2F5O | 1-(Dichloromethoxy)-1,1,2,2,2-pentafluoroethane                   |
| 43 | C3HClF6O  | 1-chloro-1,1,2,3,3,3-hexafluoropropan-2-ol                        |
| 44 | C3HF7O    | 1,1,2,2,3,3,3-heptafluoropropan-1-ol                              |
| 45 | C3HF8N    | N-(difluoromethyl)-1,1,1-trifluoro-N-(trifluoromethyl)methanamine |
| 46 | C4F10S    | Bis(perfluoroethyl)-sulphide                                      |
| 47 | C4F10S    | (Heptafluoropropyl)-(trifluoromethyl) sulfide                     |
| 48 | C4F4N2    | 2,3,5,6-Tetrafluoropyrazine                                       |
| 49 | C4F6O     | Hexafluoro-2,5-dihydrofuran                                       |
| 50 | C4F8      | Perfluoroisobutylene                                              |
| 51 | C4F8      | Octafluoro-2-butene                                               |
| 52 | C4F8      | Perfluoro-2-butene, (Z)-                                          |
| 53 | C4F8      | Octafluorobut-2-ene                                               |
| 54 | C4F8S     | Octafluorotetrahydrothiophene                                     |
| 55 | C4H2ClF7O | 2-[chloro(fluoro)methoxy]-1,1,1,3,3,3-hexafluoropropane           |
| 56 | C4H2F6    | 1,1,1,4,4,4-Hexafluoro-2-Butene                                   |
| 57 | C4H2F6    | 1,1,1,4,4,4-Hexafluorobut-2-ene                                   |
| 58 | C4H2F6    | 3,3,3-Trifluoro-2-(trifluoromethyl)propene                        |
| 59 | C4H2F6    | (2Z)-1,1,1,4,4,4-Hexafluorobut-2-ene                              |
| 60 | C4H2F6    | 1,1,1,2,4,4-Hexafluorobut-2-ene                                   |
| 61 | C4H2F6    | (E)-1,1,2,3,4,4-Hexafluorobut-2-ene                               |
| 62 | C4H2F8    | 1,1,1,2,3,3,3-Heptafluoro-2-(fluoromethyl)propane                 |



|     |          |                                                               |
|-----|----------|---------------------------------------------------------------|
| 63  | C4H2F8   | 2-(Difluoromethyl)-1,1,1,2,3,3-hexafluoropropane              |
| 64  | C4H2F8O  | 2-(Difluoromethyl)-1,1,1,3,3,3-hexafluoropropan-2-ol          |
| 65  | C4H2F8O  | 1,1,1,2,3,3,4,4-Octafluorobutan-2-ol                          |
| 66  | C4H2F8O  | 1,1,1,3,3,4,4,4-Octafluoro-2-butanol                          |
| 67  | C4H2F8O  | 1,1,2,2,3,3,4,4-Octafluorobutan-1-ol                          |
| 68  | C4H3ClF6 | 2-Chloro-1,1,1,4,4,4-hexafluorobutane                         |
| 69  | C4H3F7   | 1,1,1,2,3,3,3-Heptafluoro-2-methylpropane                     |
| 70  | C4H3F7   | 1,1,1,3,3,3,3-Hexafluoro-2-(fluoromethyl)propane              |
| 71  | C4H3F7   | 1,1,1,2,3,3,3-Hexafluoro-2-(fluoromethyl)propane              |
| 72  | C4H3F7   | 2-(Difluoromethyl)-1,1,2,3,3-pentafluoropropane               |
| 73  | C4H3F7   | 1,1,1,2,2,3,4-Heptafluorobutane                               |
| 74  | C4H3F7   | 2-Difluoromethyl-1,1,1,3,3-pentafluoropropane                 |
| 75  | C4H3F7O  | 2-(Trifluoromethyl)-2,3,3,3-tetrafluoro-1-propanol            |
| 76  | C4H3F7O  | Ethane, 1,1,1,2,2-pentafluoro-2-(2,2-difluoroethoxy)-         |
| 77  | C4H3F7O  | Sevoflurane                                                   |
| 78  | C4H3F7O  | 2-Difluoromethyl-1,1,1,3,3-pentafluoro-2-propanol             |
| 79  | C4H3F7O  | 1,1,1,3,4,4,4-Heptafluorobutan-2-ol                           |
| 80  | C4H3F7O  | 1,1,2,2,4,4,4-Heptafluorobutan-1-ol                           |
| 81  | C4H3F7O  | 1,2,3,3,4,4,4-Heptafluorobutan-1-ol                           |
| 82  | C4H3F7O  | 1,1,2,2,3,3,4-Heptafluorobutan-1-ol                           |
| 83  | C4H3F7O  | 1,1,1,3-Tetrafluoro-3-(trifluoromethoxy)propane               |
| 84  | C4H3F7O  | 1,1,1,2-Tetrafluoro-3-(trifluoromethoxy)propane               |
| 85  | C4H4ClF5 | 1-Chloro-1,1,3,3,3-pentafluoro-2-methylpropane                |
| 86  | C4H4ClF5 | 2-Chloro-1,1,1,2,4-pentafluorobutane                          |
| 87  | C4H4F4   | (E)-1,2,3,4-Tetrafluorobut-2-ene                              |
| 88  | C4H4F6   | 1,1,1,3,3,3-Hexafluoro-2-methylpropane                        |
| 89  | C4H4F6   | 1,1,1,2,3,3-Hexafluoro-2-methylpropane                        |
| 90  | C4H4F6   | 1,1,1,4,4,4-Hexafluorobutane                                  |
| 91  | C4H4F6   | 1,1,1,2,2,4-Hexafluorobutane                                  |
| 92  | C4H4F6   | 1,1,1,3,3-Pentafluoro-2-(fluoromethyl)propane                 |
| 93  | C4H4F6   | 1,1,1,2,3,4-Hexafluorobutane                                  |
| 94  | C4H4F6   | 1,1,2,3,3-Pentafluoro-2-(fluoromethyl)propane                 |
| 95  | C4H4F6   | 1,1,1,2,4,4-Hexafluorobutane                                  |
| 96  | C4H4F6   | 1,1,1,2,4,4-hexafluorobutane                                  |
| 97  | C4H4F6   | 1,1,1,3,4,4-hexafluorobutane                                  |
| 98  | C4H4F6   | 1,1,2,2,3,4-hexafluorobutane                                  |
| 99  | C4H4F6   | 1,1,2,3,4,4-hexafluorobutane                                  |
| 100 | C4H4F6O  | 3,3,3-Trifluoro-2-(trifluoromethyl)propan-1-ol                |
| 101 | C4H4F6O  | 1,1,1-Trifluoro-3-(trifluoromethoxy)propane                   |
| 102 | C4H4F6O  | 2-Difluoromethyl-1,1,3,3-tetrafluoro-2-propanol               |
| 103 | C4H4F6O  | 1,1,1,2,2-Pentafluoro-2-(1-fluoroethoxy)ethane                |
| 104 | C4H5F5   | 1,1,1,2,3-Pentafluoro-2-methylpropane                         |
| 105 | C4H5F5   | 1,1,1,4,4-Pentafluorobutane                                   |
| 106 | C4H5F5   | 1,1,1,3,3-Pentafluoro-2-methylpropane                         |
| 107 | C4H5F5   | 1,1,1,3-Tetrafluoro-2-(fluoromethyl)propane                   |
| 108 | C4H5F5   | 1,1,2,3-Tetrafluoro-2-(fluoromethyl)propane                   |
| 109 | C4H5F5   | 1,1,3,3-Tetrafluoro-2-(fluoromethyl)propane                   |
| 110 | C4H6F4   | 1,1,1,3-Tetrafluorobutane                                     |
| 111 | C4H6F4   | 1,1,1,3-Tetrafluoro-2-methylpropane                           |
| 112 | C4HClF8O | 1-Chloro-1,1,3,3,3-pentafluoro-2-(trifluoromethyl)propan-2-ol |
| 113 | C4HF7    | Tetrafluoro-2-(trifluoromethyl) propene                       |
| 114 | C4HF7    | 1,1,1,2,4,4,4-Heptafluoro-2-butene                            |
| 115 | C4HF7    | (E)-1,1,1,2,4,4,4-Heptafluorobut-2-ene                        |
| 116 | C4HF7    | 1,1,1,2,4,4,4-Heptafluorobut-2-ene                            |

|     |         |                                                        |
|-----|---------|--------------------------------------------------------|
| 117 | C4HF7   | 1,3,3,3-Tetrafluoro-2-(trifluoromethyl)propene         |
| 118 | C4HF9O  | Perfluoro-tert-butanol                                 |
| 119 | C4HF9O  | Perfluorobutanol                                       |
| 120 | C5F10   | 1,1,3,3,4,4,4-Heptafluoro-2-(trifluoromethyl)but-1-ene |
| 121 | C5F10   | 1,1,1,2,4,4,4-Heptafluoro-3-(trifluoromethyl)but-2-ene |
| 122 | C5F10   | 1,1,1,2,3,4,4,5,5,5-Decafluoropent-2-ene               |
| 123 | C5F10   | 2-Pentene, 1,1,1,2,3,4,4,5,5,5-decafluoro-             |
| 124 | C5F10   | (Z)-1,1,1,2,3,4,4,5,5,5-Decafluoropent-2-ene           |
| 125 | C5F8    | Octafluorocyclopentene                                 |
| 126 | C5H2F8  | (2E)-1,1,1,4,4,5,5,5-Octafluoropent-2-ene              |
| 127 | C5H2F8  | 1,1,1,4,4,5,5,5-Octafluoropent-2-ene                   |
| 128 | C5HF9   | 1,1,1,3,4,4,5,5,5-Nonafluoropent-2-ene                 |
| 129 | C5HF9   | 1,1,1,2,4,4,5,5,5-Nonafluoro-2-pentene                 |
| 130 | C5HF9   | 1,1,1,4,4,4-Hexafluoro-2-(trifluoromethyl)but-2-ene    |
| 131 | C5HF9   | (E)-1,1,1,3,4,4,5,5,5-Nonafluoropent-2-ene             |
| 132 | C5HF9   | (2E)-1,1,1,2,4,4,5,5,5-Nonafluoropent-2-ene            |
| 133 | C5HF9   | (E)-1,1,1,2,3,4,4,5,5-Nonafluoropent-2-ene             |
| 134 | CH2F2O  | Difluoromethanol                                       |
| 135 | CHBrF2O | Difluorobromomethanol                                  |
| 136 | CHClF2O | Chloro(difluoro)methanol                               |
| 137 | CHF3O   | Trifluoromethanol                                      |
| 138 | C2F3Cl  | 1-Chloro-1,2,2-trifluoroethene                         |
| 139 | C2F5Cl  | 1-Chloro-1,1,2,2,2-pentafluoroethane                   |
| 140 | C2F6    | 1,1,1,2,2,2-Hexafluoroethane                           |
| 141 | C4F7N   | 2,3,3,3-tetrafluoro-2-(trifluoromethyl)propanenitrile  |
| 142 | CF2Cl2  | Difluorodichloromethane                                |
| 143 | CF3Br   | Trifluorobromomethane                                  |
| 144 | CF3Cl   | Trifluorochloromethane                                 |
| 145 | CF4     | Tetrafluoromethane                                     |
| 146 | CH2F2   | Methylene difluoride                                   |
| 147 | CHF2Cl  | Difluorochloromethane                                  |
| 148 | CHFC12  | dichloro(fluoro)methane                                |
| 149 | CHF3    | Fluoroform                                             |
| 150 | CF3CN   | Trifluoroacetonitrile                                  |

**Table S2.** Chemical formula and IUPAC name for each of 18 non-PFC compounds drawn in Figure S2.

| No. | Formula  | IUPAC name          |
|-----|----------|---------------------|
| 1   | C2H2     | Acetylen            |
| 2   | C2H4O    | 1,2-Epoxyethane     |
| 3   | C2H5Cl   | Chloroethane        |
| 4   | C2H7N    | N-Methylmethanamine |
| 5   | CCl4     | Tetrachloromethane  |
| 6   | CH3Br    | Bromomethane        |
| 7   | CH3CHCl2 | Ethylidene chloride |
| 8   | CH3Cl    | Chloromethane       |
| 9   | CH3CN    | Cyanomethane        |
| 10  | CH3NH2   | Methanamine         |

---

|           |                                 |                      |
|-----------|---------------------------------|----------------------|
| <b>11</b> | CH <sub>4</sub>                 | methane              |
| <b>12</b> | CHCl <sub>3</sub>               | Trichloromethane     |
| <b>13</b> | CO <sub>2</sub>                 | carbon dioxide       |
| <b>14</b> | COS                             | Carbon oxide sulfide |
| <b>15</b> | N <sub>2</sub> O                | Nitroous Oxide       |
| <b>16</b> | C <sub>2</sub> H <sub>6</sub>   | Ethane               |
| <b>17</b> | CH <sub>2</sub> Cl <sub>2</sub> | Methylene dichloride |
| <b>18</b> | SO <sub>2</sub>                 | Sulfur Dioxide       |

---
